# Supplementary material for: A screening method for the quantitative determination of selective androgen receptor modulators (SARMs) in capsules by high resolution 19F- and 1H-NMR spectroscopy
Source: Royal Society of Chemistry journal article supplement (doi:10.1039/d4ay00188e), 2024-01-01
Supplement: d4ay00188e1.pdf [file d4ay00188e1.pdf]

## Supplementary Material

### A Screening Method for the Quantitative Determination of Selective Androgen Receptor Modulators (SARMs) in Capsules by High Resolution $^{19}\text{F}$ - and $^1\text{H}$ -NMR Spectroscopy

Alessandro Maccelli, Anna Borioni, Federica Aureli, Maria Cristina Gaudiano, Livia Manna, Mariangela Raimondo\*

*Chemical Medicines Unit, National Centre for the Control and Evaluation of Medicines, Istituto Superiore di Sanità, Viale Regina Elena 299, 00161, Roma, Italy*

**p3 Figure S1.** Mass spectrometry: extracted ion chromatograms (EIC) of the SARMs reference standards.

**p4 Figure S2.** Superimposition of the total ion chromatograms of the SARMs samples (full line) with the reference standards EIC (dotted line). The good overlapping of the full line and the dotted line, and the absence of signals in the blank chromatogram (not shown), confirmed the selectivity of the MS method.

**p5 Figure S3.** Comparison of the experimental isotope distribution of the SARMs (Panel A) with the corresponding theoretical distribution (Panel B). The good match of the  $m/z$  distributions supported identification.

**p6 Figure S4.**  $^1\text{H}$ ,  $^{13}\text{C}$ ,  $^1\text{H}$ - $^{13}\text{C}$  HSQC,  $^1\text{H}$ - $^{13}\text{C}$  HMBC spectra of Cardarine reported as an example.

**Panel A:** Zoom of the  $^1\text{H}$  spectrum. The signals of the five non-equivalent proton groups are present in the 8.7-6.5 ppm aromatic range. The singlet at about 9.7 ppm was assigned to the carboxyl proton;

**Panel B:** Zoom of the  $^{13}\text{C}$  spectrum. The numerous signals detected in the 140-120 ppm range are partly due to the splitting caused by carbon-fluorine coupling; **Panel C:** Zoom of the  $^{13}\text{C}$  spectrum evidencing the signal quartets of the carbons coupled to fluorines. The quartets are evidenced by blue brackets. The signal of the carbon directly bonded to fluorine is centred at about 124 ppm and shows

a 272.4 Hz carbon-fluorine coupling ( $\text{CF}_3$ ,  $J_{\text{C-F}}=272.4$  Hz). The quartet at 129 ppm belongs to the carbon one bond apart from fluorine ( $\text{C4}''$ ,  $J_{\text{C-F}}=34.0$  Hz) and the tight quartet at about 126 ppm was assigned to the carbons two bonds apart from fluorine ( $\text{C3}''$ ,  $\text{C5}''$ ,  $J_{\text{C-F}}=3.7$  Hz); **Panel D:**

Superimposed  $^1\text{H}$ - $^{13}\text{C}$  HMBC (blue) and  $^1\text{H}$ - $^{13}\text{C}$  HSQC (green/pink) spectra. The pink and green cross peaks represent proton correlation with  $\text{CH}_2$  and  $\text{CH}/\text{CH}_3$  groups respectively. The blue cross peaks are representative of the structural carbon backbone. It is noteworthy that each of two methyl groups found at about 2 ppm selectively correlates to the closer aromatic ring in the structure (circled in red).

**p8 Figure S5.** Comparison between SARMS extraction performed in EtOH (red) vs DMSO (blue). Results are reported as % in respect to the declared content.

**p9 Figure S6.** Overlapped <sup>1</sup>H- NMR spectra obtained by the pulse programs: zg (blue), zgpr (red), noesygppr1d (green), cpmgpr1d (purple). The SARMS spectra are coded as follows: Andarine (panel A), Cardarine (panel B), Ligandrol (panel C), Ostarine (panel D), S-23 (panel E).

**p10 Figure S7.** qNMR linearity for <sup>19</sup>F-zgig30 (blue profile), <sup>1</sup>H-zg (orange profile) and <sup>1</sup>H-zgpreq (green profile) per SARM. The linear regression equation and R<sup>2</sup> are reported for each NMR experiment.

**p11 Figure S8.** Trend of the residuals of qNMR linearity for <sup>19</sup>F-zgig30 (blue profile), <sup>1</sup>H-zg (orange profile) and <sup>1</sup>H-zgpreq (green profile) per SARM. All residuals are within ±2σ as evidenced in the inserts.

**p12 Table S1.** Acquisition and processing parameters of <sup>19</sup>F- and <sup>1</sup>H-qNMR analytical methods

**p13 Table S2.** Summary of Mass Spectrometry results.

**p14 Table S3.** Repeatability obtained by six consecutive measurements of each SARM by <sup>19</sup>F-NMR. Results are expressed as mg/capsule. RSD threshold limit was 1.5%.

**p15 Table S4.** Intermediate precision of <sup>19</sup>F-qNMR. Each sample content is reported as mg/cps. The results were obtained from integrations of the same samples performed by three different operators. The RSD is within 3.0% for all the experiments.

**p16 Table S5.** Precision (RSD) of the results obtained on three samples for each NMR experiment. The % is referred to the intermediate weight. All the weights are within the linearity range.

**p17 Table S6.** Linear and Multiple Regression and Correlation of the pulse programs <sup>19</sup>F-zgig30, <sup>1</sup>H-zg, <sup>1</sup>H-zgpreq.

**p18 Table S7.** LOD and LOQ per SARM referred to each pulse program.

**p19 Table S8.** Robustness: acquisition parameters and results for the following pulse programs: <sup>19</sup>F-zgig30 (upper section), <sup>1</sup>H-zg (intermediate section) and <sup>1</sup>H-zgpreq (lower section).

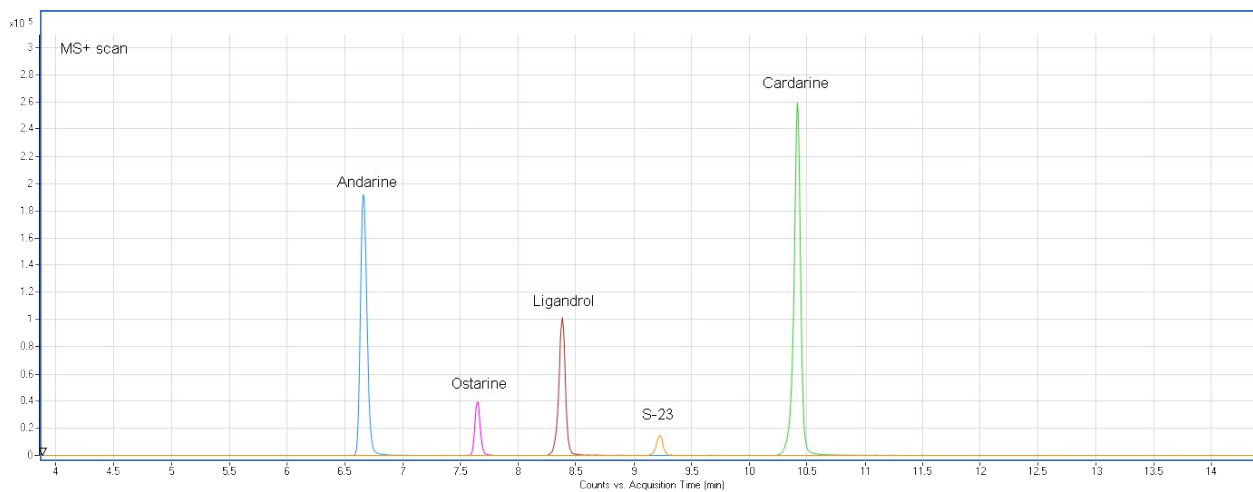

**Figure S1.** Mass spectrometry: extracted ion chromatograms (EIC) of the SARMs reference standards.

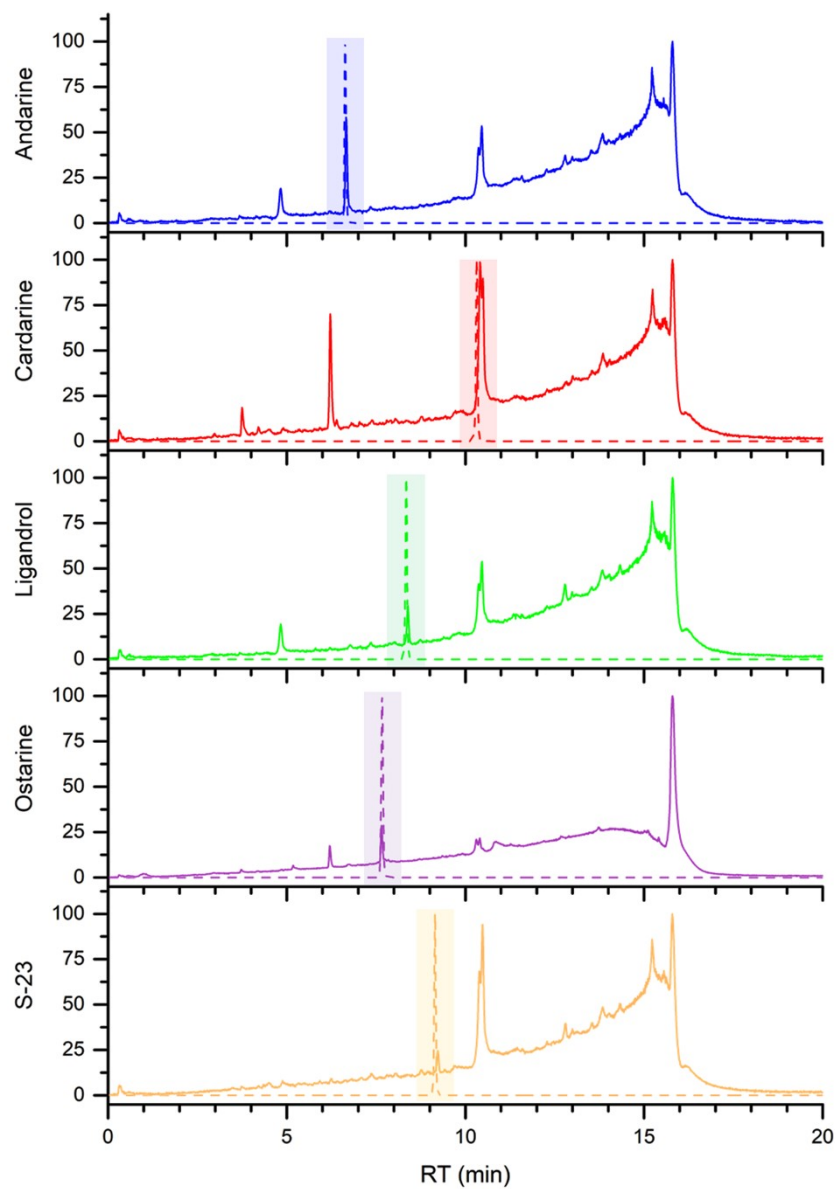

**Figure S2.** Superimposition of the total ion chromatograms of the SARMS samples (full line) with the reference standards EIC (dotted line). The good overlapping of the full line and the dotted line, and the absence of signals in the blank chromatogram (not shown), confirmed the selectivity of the MS method.

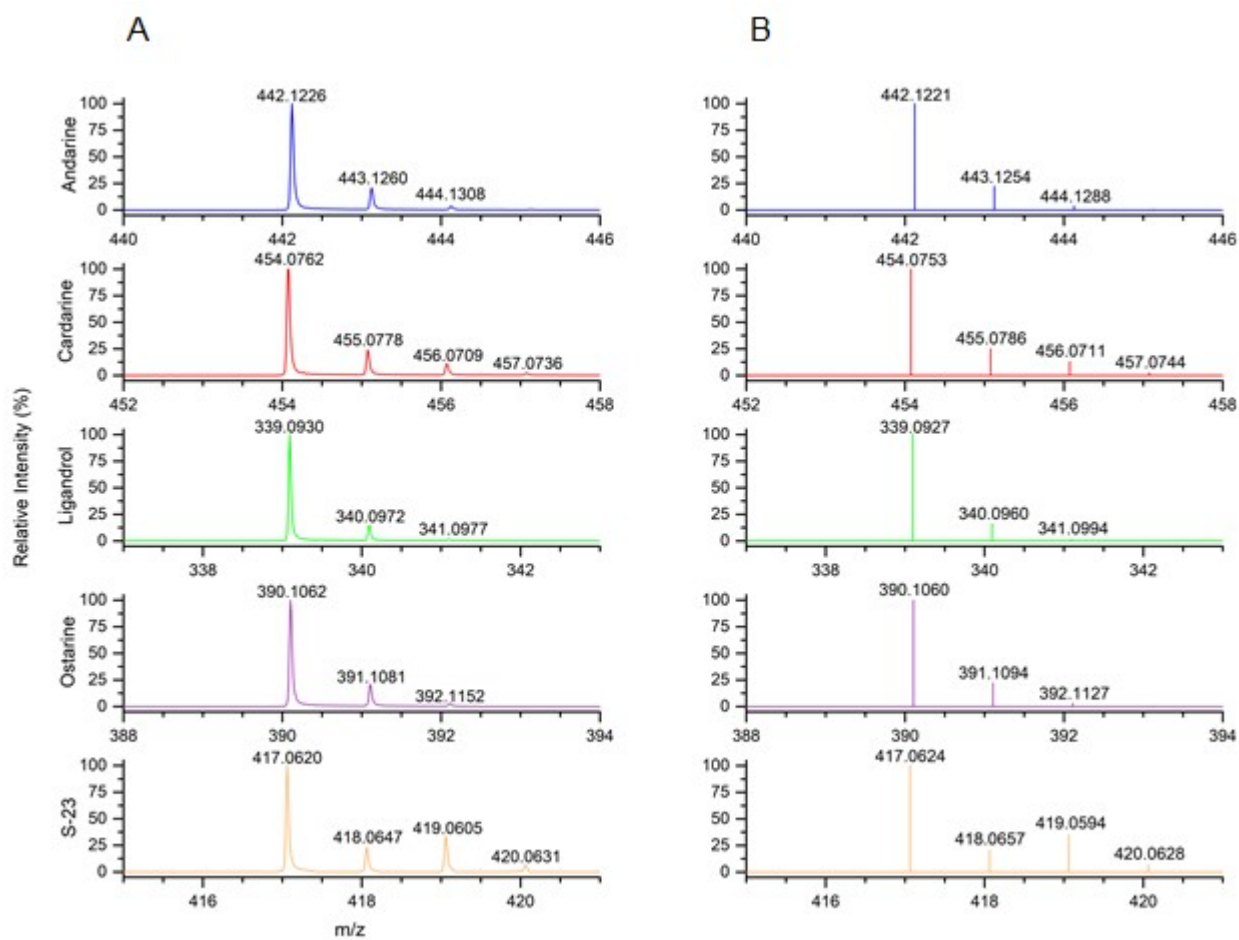

**Figure S3.** Comparison of the experimental isotope distribution of the SARMs (Panel A) with the corresponding theoretical distribution (Panel B). The good match of the m/z distributions supported identification.

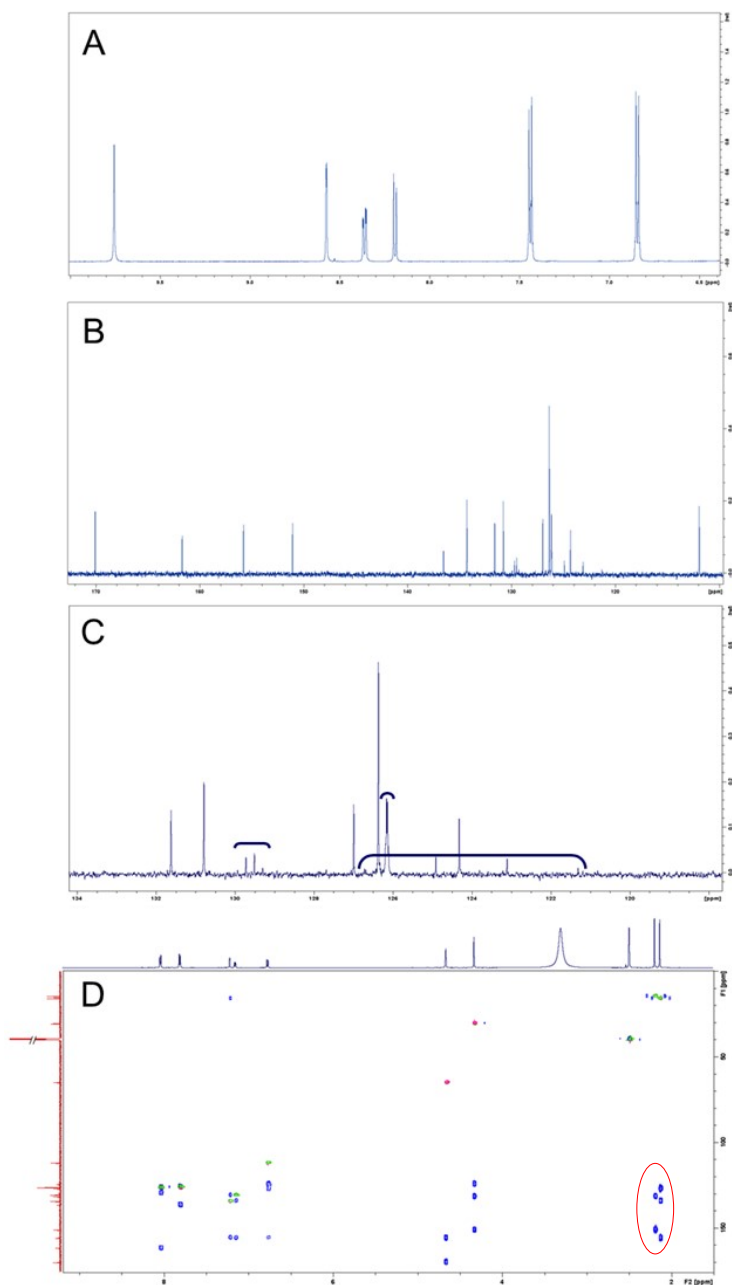

**Figure S4.**  $^1\text{H}$ ,  $^{13}\text{C}$ ,  $^1\text{H}$ - $^{13}\text{C}$  HSQC,  $^1\text{H}$ - $^{13}\text{C}$  HMBC spectra of Cardarine reported as an example.

**Panel A:** Zoom of the  $^1\text{H}$  spectrum. The signals of the five non-equivalent proton groups are present in the 8.7-6.5 ppm aromatic range. The singlet at about 9.7 ppm was assigned to the carboxyl proton;

**Panel B:** Zoom of the  $^{13}\text{C}$  spectrum. The numerous signals detected in the 140-120 ppm range are partly due to the splitting caused by carbon-fluorine coupling;

**Panel C:** Zoom of the  $^{13}\text{C}$  spectrum evidencing the signal quartets of the carbons coupled to fluorines. The quartets are evidenced by blue brackets. The signal of the carbon directly bonded to fluorine is centred at about 124 ppm and shows a 272.4 Hz carbon-fluorine coupling ( $\text{CF}_3$ ,  $J_{\text{C-F}}=272.4$  Hz). The quartet at 129 ppm belongs to the carbon one bond apart from fluorine ( $\text{C4}''$ ,  $J_{\text{C-F}}=34.0$  Hz) and the tight quartet at about 126 ppm was assigned to the carbons two bonds apart from fluorine ( $\text{C3}''$ ,  $\text{C5}''$ ,  $J_{\text{C-F}}=3.7$  Hz);

**Panel D:** Superimposed  $^1\text{H}$ - $^{13}\text{C}$  HMBC (blue) and  $^1\text{H}$ - $^{13}\text{C}$  HSQC (green/pink) spectra. The pink and green cross peaks represent proton correlation with  $\text{CH}_2$  and  $\text{CH/CH}_3$  groups respectively. The blue cross peaks

are representative of the structural carbon backbone. It is noteworthy that each of two methyl groups found at about 2 ppm selectively correlates to the closer aromatic ring in the structure (circled in red).

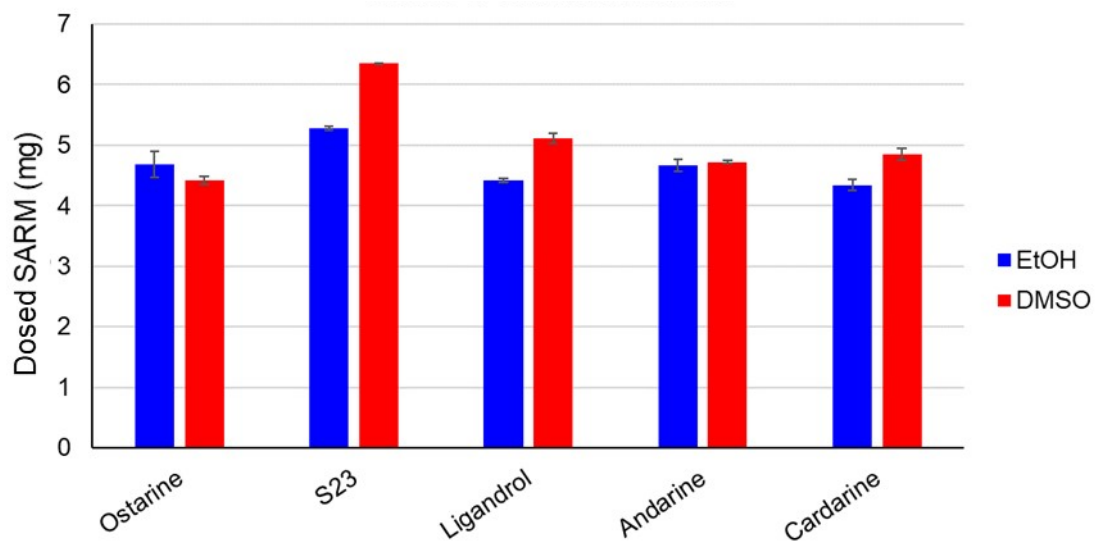

**Figure S5.** Comparison between SARMS extraction performed in EtOH (blue) vs DMSO (red). Results are reported as mg of SARM.



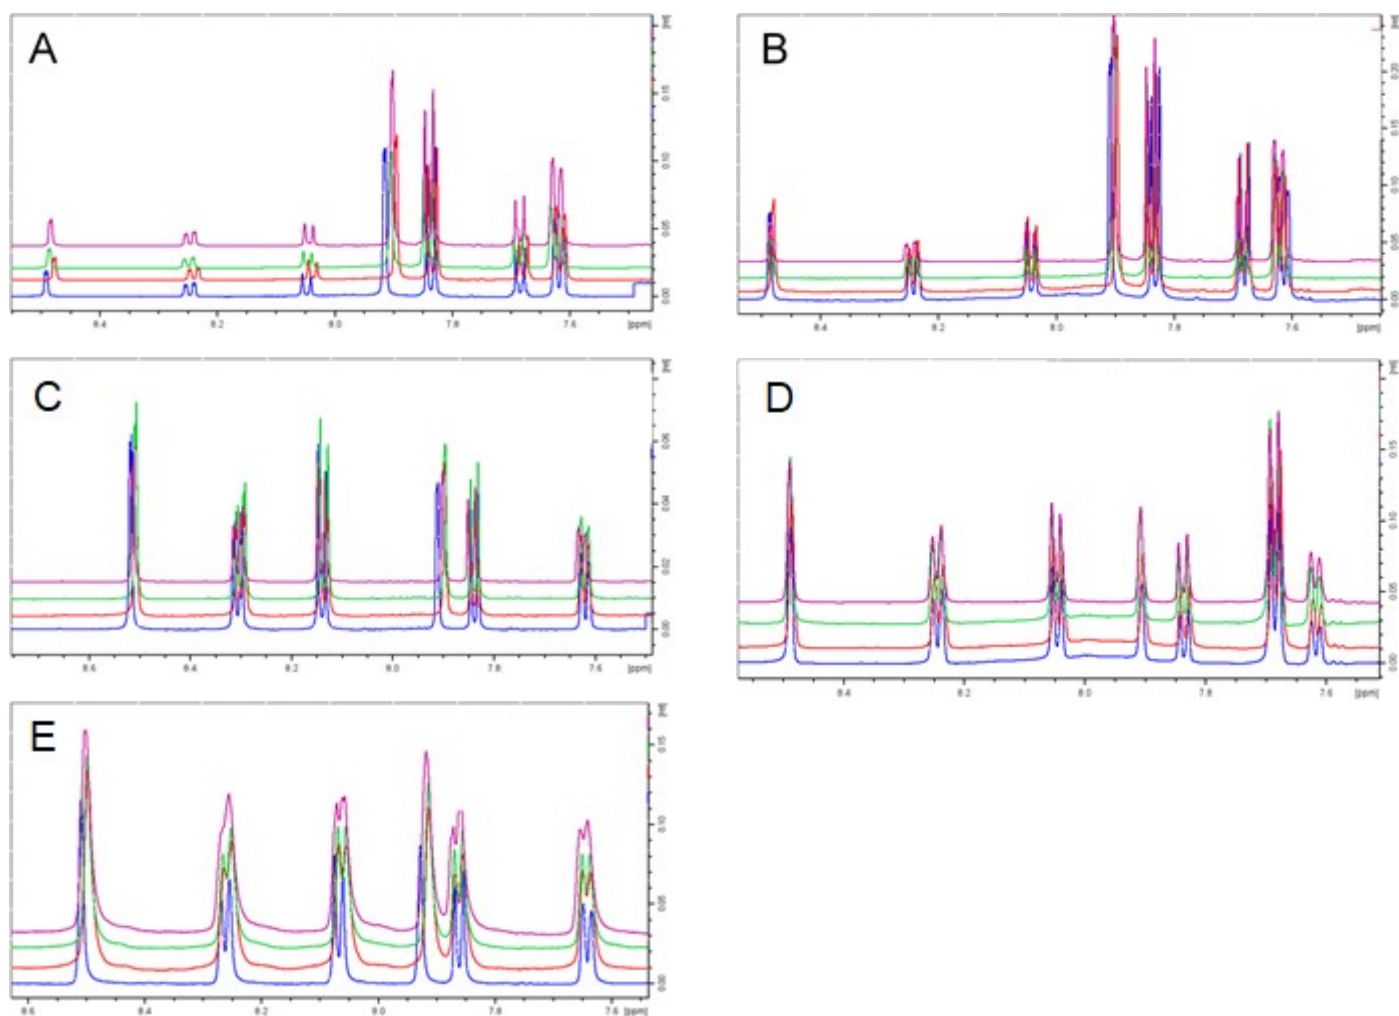

**Figure S6.** Overlapped <sup>1</sup>H- NMR spectra obtained by the pulse programs: zg (blue), zgpr (red), noesygppr1d (green), cpmgpr1d (purple). The SARMs spectra are coded as follows: Andarine (panel A), Cardarine (panel B), Ligandrol (panel C), Ostarine (panel D), S-23 (panel E).

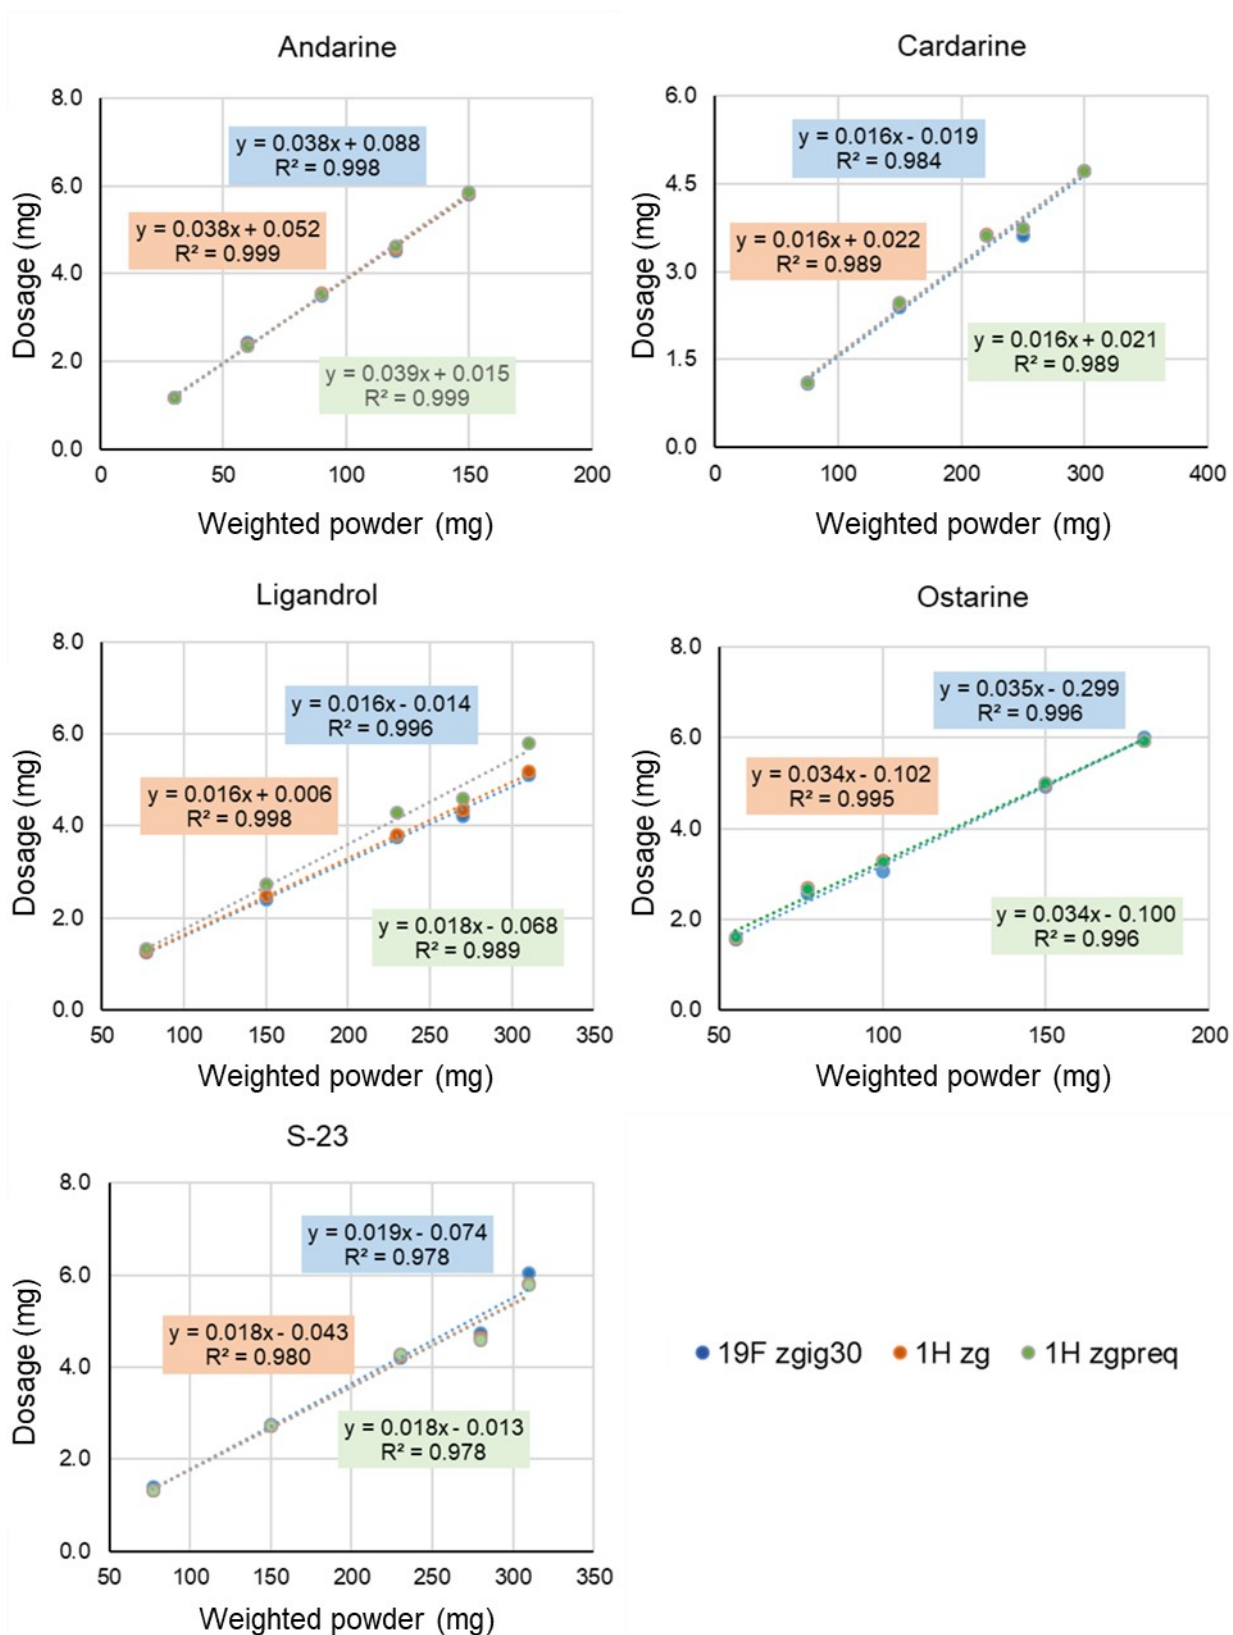

**Figure S7.** qNMR linearity for  $^{19}\text{F}$ -zgig30 (blue profile),  $^1\text{H}$ -zg (orange profile) and  $^1\text{H}$ -zgpreq (green profile) per SARM. The linear regression equation and  $R^2$  are reported for each NMR experiment.

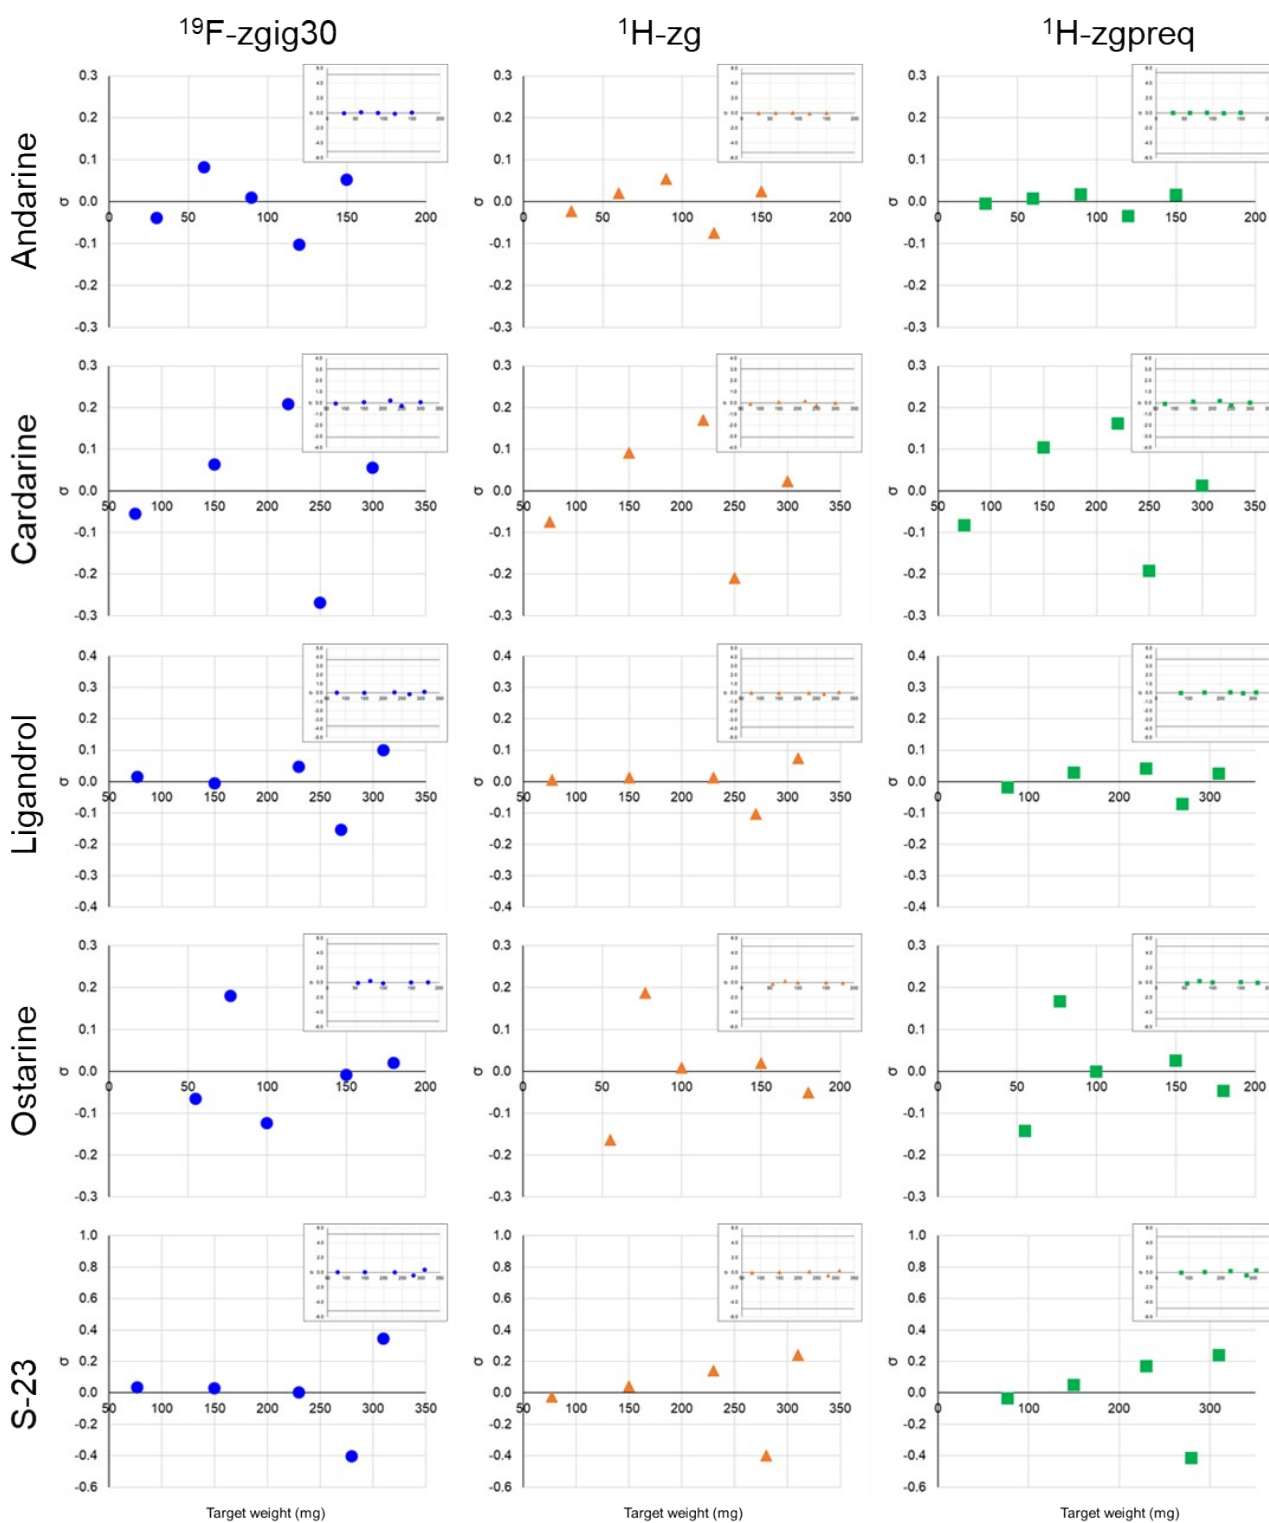

**Figure S8.** Trend of the residuals of qNMR linearity for  $^{19}\text{F}$  zgig30 (blue profile),  $^1\text{H}$  zg (orange profile) and  $^1\text{H}$  zgpreq (green profile) per SARM. All residuals are within  $\pm 2\sigma$

**Table S1.** Acquisition and processing parameters of  $^{19}\text{F}$ - and  $^1\text{H}$ -qNMR analytical methods

| <b><math>^{19}\text{F}</math>-zgig30</b> |                    |                       |           |
|------------------------------------------|--------------------|-----------------------|-----------|
| Pulse angle                              | 30°                | NS                    | 24        |
| Pulse strength                           | 15 dB              | Size of FID           | 128 k     |
| Pulse length                             | 4 $\mu\text{s}$    | Size of real spectrum | 512 k     |
| Measurement Temperature                  | 298 K              | Line broadening       | 0.3 Hz    |
| Pre-acquisition delay                    | 6.50 $\mu\text{s}$ | Expt                  | 3.75 min  |
| Acquisition time                         | 1.2 s              |                       |           |
| Relaxation delay d1                      | 10 s               |                       |           |
| O1P                                      | -65.0 ppm          |                       |           |
| <b><math>^1\text{H}</math>-zg</b>        |                    |                       |           |
| Pulse angle                              | 90°                | NS                    | 24        |
| Pulse strength                           | 12 dB              | Size of FID           | 64 k      |
| Pulse length                             | 12 $\mu\text{s}$   | Size of real spectrum | 512 k     |
| Measurement Temperature                  | 298 K              | Line broadening       | 0.3 Hz    |
| Pre-acquisition delay                    | 6.50 $\mu\text{s}$ | Expt                  | 19.1 min  |
| Acquisition time                         | 2.8 s              |                       |           |
| Relaxation delay (d1)                    | 45 s               |                       |           |
| O1P                                      | 2.5 ppm            |                       |           |
| <b><math>^1\text{H}</math>-zgpreq</b>    |                    |                       |           |
| Pulse angle                              | 90°                | NS                    | 24        |
| Pulse strength                           | 12 dB              | Size of FID           | 64 k      |
| Pulse length                             | 12 $\mu\text{s}$   | Size of real spectrum | 512 k     |
| Measurement Temperature                  | 298 K              | Line broadening       | 0.3 Hz    |
| Preacquisition delay                     | 6.50 $\mu\text{s}$ | PLW[9]                | 6.8e-05 W |
| Acquisition time                         | 2.8 s              | Expt                  | 19.5 min  |
| Relaxation delay (d9)                    | 45 s               |                       |           |
| Solvent suppression delay (d1)           | 1 s                |                       |           |
| O1P                                      | -65.0 ppm          |                       |           |

**Table S2.** Summary of Mass Spectrometry results

| AI        | MF <sup>a</sup>                                                                | $m/z$ <sub>exp</sub> <sup>b</sup> | $m/z$ <sub>theo</sub> <sup>b</sup> | $\Delta$ ppm | RT <sub>Sample</sub> | RT <sub>STD</sub> | MS/MS <sup>c</sup>                |                  |
|-----------|--------------------------------------------------------------------------------|-----------------------------------|------------------------------------|--------------|----------------------|-------------------|-----------------------------------|------------------|
|           |                                                                                |                                   |                                    |              |                      |                   | $m/z$ <sub>exp</sub> <sup>b</sup> | Rel. Intens. (%) |
| Andarine  | C <sub>19</sub> H <sub>18</sub> F <sub>3</sub> N <sub>3</sub> O <sub>6</sub>   | 442.1226                          | 442.1221                           | 1.1          | 6.66                 | 6.64              | 208.097                           | 100.0            |
|           |                                                                                |                                   |                                    |              |                      |                   | 190.086                           | 42.1             |
|           |                                                                                |                                   |                                    |              |                      |                   | 108.045                           | 29.0             |
|           |                                                                                |                                   |                                    |              |                      |                   | 166.086                           | 18.8             |
| Cardarine | C <sub>21</sub> H <sub>18</sub> F <sub>3</sub> NO <sub>3</sub> S <sub>2</sub>  | 454.0762                          | 454.0753                           | 2.0          | 10.46                | 10.33             | 454.075                           | 100.0            |
|           |                                                                                |                                   |                                    |              |                      |                   | 257.048                           | 47.0             |
| Ligandrol | C <sub>14</sub> H <sub>12</sub> F <sub>6</sub> N <sub>2</sub> O                | 339.0930                          | 339.0927                           | 0.9          | 8.37                 | 8.34              | 339.092                           | 100.0            |
|           |                                                                                |                                   |                                    |              |                      |                   | 199.048                           | 16.8             |
| Ostarine  | C <sub>19</sub> H <sub>14</sub> F <sub>3</sub> N <sub>3</sub> O <sub>3</sub>   | 390.1062                          | 390.1060                           | 0.5          | 7.66                 | 7.67              | 370.099                           | 100              |
|           |                                                                                |                                   |                                    |              |                      |                   | 120.044                           | 33.9             |
|           |                                                                                |                                   |                                    |              |                      |                   | 251.061                           | 29.1             |
|           |                                                                                |                                   |                                    |              |                      |                   | 271.069                           | 14.5             |
|           |                                                                                |                                   |                                    |              |                      |                   | 193.021                           | 17.3             |
| 187.046   | 10.9                                                                           |                                   |                                    |              |                      |                   |                                   |                  |
| S-23      | C <sub>18</sub> H <sub>13</sub> ClF <sub>4</sub> N <sub>2</sub> O <sub>3</sub> | 417.0620                          | 417.0624                           | -0.9         | 9.23                 | 9.16              | 187.045                           | 100.0            |
|           |                                                                                |                                   |                                    |              |                      |                   | 185.016                           | 38.9             |
|           |                                                                                |                                   |                                    |              |                      |                   | 203.026                           | 15.5             |
|           |                                                                                |                                   |                                    |              |                      |                   | 213.023                           | 14.6             |
|           |                                                                                |                                   |                                    |              |                      |                   | 188.050                           | 7.4              |

a MF stands for Molecular Formula. All SARMS were detected as protonated species.

b  $m/z$ <sub>exp</sub> and  $m/z$ <sub>theo</sub> stand for experimental and theoretical  $m/z$  ratio, respectively.

c MS/MS experiments were performed with a collision energy = 20V

**Table S3.** Repeatability obtained by six consecutive measurements of each SARM by <sup>19</sup>F-NMR. Results are expressed as mg/capsule. The RSD acceptance criteria was 1.5%.

| <b>Dosed SARM (mg/cps)</b> | <b>#1</b> | <b>#2</b> | <b>#3</b> | <b>#4</b> | <b>#5</b> | <b>#6</b> | <b>Mean</b> | <b>Std Dev</b> | <b>RSD</b> |
|----------------------------|-----------|-----------|-----------|-----------|-----------|-----------|-------------|----------------|------------|
| Andarine                   | 19.2      | 19.1      | 19.0      | 19.2      | 19.1      | 19.2      | 19.1        | 0.05           | 0.28       |
| Cardarine                  | 7.5       | 7.5       | 7.5       | 7.6       | 7.6       | 7.6       | 7.5         | 0.05           | 0.70       |
| Ligandrol                  | 8.8       | 8.7       | 8.9       | 8.8       | 8.9       | 8.8       | 8.8         | 0.06           | 0.68       |
| Ostarine                   | 13.1      | 13.2      | 13.1      | 13.2      | 13.0      | 13.1      | 13.1        | 0.04           | 0.29       |
| S-23                       | 9.4       | 9.4       | 9.2       | 9.3       | 9.4       | 9.3       | 9.3         | 0.06           | 0.61       |

**Table S4.** Intermediate precision of  $^{19}\text{F}$ -qNMR. Each sample content is reported as mg/cps. The results were obtained from integrations of the same samples performed by three different operators. The RSD is within 3.0% for all the experiments.

|           | <b>Operator 1</b> | <b>SD</b> | <b>Operator 2</b> | <b>SD</b> | <b>Operator 3</b> | <b>SD</b> | <b>SD total</b> | <b>Mean</b> | <b>RSD%</b> |
|-----------|-------------------|-----------|-------------------|-----------|-------------------|-----------|-----------------|-------------|-------------|
| Andarine  | 20.1              | 0.33      | 19.7              | 0.3       | 20.2              | 0.1       | 0.2             | 20.0        | 1.0         |
| Cardarine | 7.8               | 0.03      | 7.8               | 0.1       | 8.1               | 0.2       | 0.1             | 8.0         | 1.7         |
| Ligandrol | 8.6               | 0.18      | 8.3               | 0.3       | 8.9               | 0.2       | 0.2             | 8.6         | 2.7         |
| Ostarine  | 13.5              | 0.06      | 13.7              | 0.2       | 13.5              | 0.2       | 0.1             | 13.6        | 0.7         |
| S-23      | 9.3               | 0.10      | 9.1               | 0.1       | 9.2               | 0.1       | 0.1             | 9.2         | 0.8         |

**Table S5.** Precision (RSD) of the results obtained on three samples for each NMR experiment.

The % is referred to the intermediate weight. All the weights are within the linearity range.

| SARM      | Sample Weight   | RSD                    |                   |                       |
|-----------|-----------------|------------------------|-------------------|-----------------------|
|           |                 | <sup>19</sup> F-zgig30 | <sup>1</sup> H-zg | <sup>1</sup> H-zgpreq |
| Andarine  | 67%, 100%, 167% | 0.5                    | 1.4               | 1.6                   |
| Cardarine | 50%, 100%, 167% | 2.9                    | 3.8               | 0.9                   |
| Ligandrol | 65%, 100%, 135% | 1.6                    | 0.5               | 2.2                   |
| Ostarine  | 77%, 100%, 180% | 1.5                    | 0.4               | 0.4                   |
| S-23      | 51%, 100%, 206% | 2.7                    | 3.5               | 3.2                   |

**Table S6.** Linear and Multiple Regression and Correlation of the pulse programs <sup>19</sup>F-zgig30, <sup>1</sup>H-zg, <sup>1</sup>H-zgpreq.



| Pulse program                                                            | Linearity regression                           | SARMs     |           |           |          |         |
|--------------------------------------------------------------------------|------------------------------------------------|-----------|-----------|-----------|----------|---------|
|                                                                          |                                                | Andarine  | Cardarine | Ligandrol | Ostarine | S-23    |
| <sup>19</sup> F-zgig30                                                   | R <sup>2</sup>                                 | 0.998     | 0.989     | 0.996     | 0.996    | 0.978   |
|                                                                          | Slope                                          | 0.038     | 0.016     | 0.016     | 0.035    | 0.019   |
|                                                                          | Intercept                                      | 0.088     | 0.021     | -0.014    | -0.299   | -0.074  |
|                                                                          | Standard Error                                 | 0.085     | 0.160     | 0.110     | 0.132    | 0.307   |
|                                                                          | Residual sum square                            | 0.022     | 0.077     | 0.036     | 0.052    | 0.283   |
|                                                                          | F                                              | 1780.253  | 296.287   | 765.699   | 745.505  | 134.497 |
| <sup>1</sup> H-zg                                                        | R <sup>2</sup>                                 | 0.999     | 0.989     | 0.998     | 0.995    | 0.981   |
|                                                                          | Slope                                          | 0.038     | 0.0156    | 0.016     | 0.034    | 0.0181  |
|                                                                          | Intercept                                      | 0.052     | 0.0221    | 0.006     | -0.102   | -0.043  |
|                                                                          | Standard Error                                 | 0.058     | 0.169     | 0.074     | 0.147    | 0.282   |
|                                                                          | Residual sum square                            | 0.010     | 0.0859    | 0.017     | 0.065    | 0.239   |
|                                                                          | F                                              | 3938.362  | 264.121   | 1735.157  | 563.260  | 150.290 |
| <sup>1</sup> H-zgpreq                                                    | R <sup>2</sup>                                 | 0.999     | 0.989     | 0.999     | 0.996    | 0.978   |
|                                                                          | Slope                                          | 0.039     | 0.016     | 0.016     | 0.034    | 0.018   |
|                                                                          | Intercept                                      | 0.015     | 0.022     | 0.018     | -0.100   | -0.013  |
|                                                                          | Standard Error                                 | 0.025     | 0.169     | 0.054     | 0.130    | 0.295   |
|                                                                          | Residual sum square                            | 0.002     | 0.086     | 0.009     | 0.0510   | 0.262   |
|                                                                          | F                                              | 21878.430 | 264.121   | 3277.896  | 717.001  | 135.010 |
| <b>Multiple Regression on combined results from three pulse programs</b> | R <sup>m</sup>                                 | 0.999     | 0.994     | 0.999     | 0.998    | 0.999   |
|                                                                          | Standard Error                                 | 0,053     | 0.178     | 0.077     | 0.128    | 0.290   |
|                                                                          | F                                              | 4633,85   | 237.97    | 1589.66   | 757.87   | 924.99  |
|                                                                          | F significance                                 | 0.000     | 0.000     | 0.000     | 0.000    | 0.001   |
| <b>Correlation</b>                                                       | <sup>19</sup> F-zgig30 - <sup>1</sup> H-zg     | 0.999     | 0.999     | 0.999     | 0.999    | 0.999   |
|                                                                          | <sup>19</sup> F-zgig30 - <sup>1</sup> H-zgpreq | 0.999     | 0.999     | 0.999     | 0.999    | 0.999   |
|                                                                          | <sup>1</sup> H-zg - <sup>1</sup> H-zgpreq      | 0.999     | 1         | 0.999     | 0.999    | 0.999   |

**Table S6.** LOD and LOQ per SARM referred to each pulse program.

| Pulse program          | C (mg/ml)   | Andarine | Cardarine | Ligandrol | Ostarine | S-23 |
|------------------------|-------------|----------|-----------|-----------|----------|------|
|                        |             | 1.69     | 1.70      | 1.69      | 2.67     | 2.06 |
| <sup>19</sup> F-zgig30 | NS          | 16       | 16        | 16        | 16       | 16   |
|                        | RG          | 101      | 101       | 101       | 101      | 101  |
|                        | S/N         | 481      | 345       | 191       | 140      | 365  |
|                        | LoD (mg/ml) | 0.01     | 0.01      | 0.03      | 0.06     | 0.02 |
|                        | LoQ (mg/ml) | 0.03     | 0.05      | 0.09      | 0.19     | 0.06 |
| <sup>1</sup> H-zg      | NS          | 24       | 24        | 24        | 24       | 24   |
|                        | RG          | 1.94     | 1.67      | 1.94      | 1.74     | 1.94 |
|                        | S/N         | 453      | 69        | 91        | 140      | 197  |
|                        | LoD (mg/ml) | 0.01     | 0.07      | 0.05      | 0.06     | 0.03 |
|                        | LoQ (mg/ml) | 0.04     | 0.24      | 0.18      | 0.19     | 0.10 |
| <sup>1</sup> H-zgpreq  | NS          | 24       | 24        | 24        | 24       | 24   |
|                        | RG          | 17.37    | 11.54     | 22.35     | 10.3     | 8.92 |
|                        | S/N         | 599      | 135       | 219       | 172      | 340  |
|                        | LoD (mg/ml) | 0.01     | 0.04      | 0.02      | 0.05     | 0.02 |
|                        | LoQ (mg/ml) | 0.03     | 0.12      | 0.08      | 0.15     | 0.06 |

**TableS7.** Robustness: acquisition parameters and results for pulse programs:  $^{19}\text{F}$ -zgig30 (upper section),  $^1\text{H}$ -zg (intermediate section) and  $^1\text{H}$ -zgpreg (lower section). Recovery is reported as % in respect to the results obtained by the reference experiment (reported in bold).

| $^{19}\text{F}$ -zgig30 |                                    |                |              |                |              |
|-------------------------|------------------------------------|----------------|--------------|----------------|--------------|
| Ostarine                |                                    |                | Ligandrol    |                |              |
| Parameter               |                                    | Dosed (mg/cps) | Recovery (%) | Dosed (mg/cps) | Recovery (%) |
| O1P                     | -50 ppm                            | 13.6           | 99.8         | 8.6            | 96.8         |
|                         | <b>-65 ppm</b>                     | <b>13.6</b>    | <b>100.0</b> | <b>8.8</b>     | <b>100.0</b> |
|                         | -80 ppm                            | 13.7           | 100.2        | 8.9            | 100.8        |
| p1                      | 11 $\mu\text{s}$                   | 13.6           | 99.8         | 9.0            | 101.8        |
|                         | <b>12 <math>\mu\text{s}</math></b> | <b>13.6</b>    | <b>100.0</b> | <b>8.8</b>     | <b>100.0</b> |
|                         | 13 $\mu\text{s}$                   | 13.6           | 99.5         | 8.5            | 96.3         |
| PCPD2                   | 60 $\mu\text{s}$                   | 13.7           | 100.5        | 8.5            | 96.3         |
|                         | <b>70 <math>\mu\text{s}</math></b> | <b>13.6</b>    | <b>100.0</b> | <b>8.8</b>     | <b>100.0</b> |
|                         | 80 $\mu\text{s}$                   | 13.6           | 100.0        | 8.7            | 97.9         |

  

| $^1\text{H}$ -zg |                                    |             |              |            |              |
|------------------|------------------------------------|-------------|--------------|------------|--------------|
| Ostarine         |                                    |             | Ligandrol    |            |              |
| Parameter        |                                    | Dosed (mg)  | Recovery (%) | Dosed (mg) | Recovery (%) |
| O1P              | 2.4 ppm                            | 13.6        | 100.0        | 9.0        | 101.9        |
|                  | <b>2.5 ppm</b>                     | <b>13.6</b> | <b>100.0</b> | <b>8.8</b> | <b>100.0</b> |
|                  | 2.6 ppm                            | 13.6        | 99.9         | 9.1        | 102.8        |
| p1               | 9 $\mu\text{s}$                    | 13.6        | 100.0        | 9.1        | 102.6        |
|                  | <b>10 <math>\mu\text{s}</math></b> | <b>13.6</b> | <b>100.0</b> | <b>8.8</b> | <b>100.0</b> |
|                  | 11 $\mu\text{s}$                   | 13.5        | 99.3         | 9.3        | 104.6        |

  

| $^1\text{H}$ -zgpreg |                                    |             |              |            |              |
|----------------------|------------------------------------|-------------|--------------|------------|--------------|
| Ostarine             |                                    |             | Ligandrol    |            |              |
| Parameter            |                                    | Dosed (mg)  | Recovery (%) | Dosed (mg) | Recovery (%) |
| d1                   | 0.5 s                              | 13.8        | 101.5        | 9.1        | 103.3        |
|                      | <b>1 s</b>                         | <b>13.6</b> | <b>100.0</b> | <b>8.8</b> | <b>100.0</b> |
|                      | 1.5 s                              | 13.6        | 99.5         | 9.1        | 103.0        |
| p1                   | 9 $\mu\text{s}$                    | 13.5        | 99.3         | 9.0        | 102.0        |
|                      | <b>10 <math>\mu\text{s}</math></b> | <b>13.6</b> | <b>100.0</b> | <b>8.8</b> | <b>100.0</b> |
|                      | 11 $\mu\text{s}$                   | 13.5        | 99.2         | 9.0        | 101.3        |
